# Supplementary material for: Reduction mechanism of a coordinated superoxide by thiols in acidic media
Source: Royal Society of Chemistry journal article supplement (doi:10.1039/b918582h), 2010-01-01
Supplement: b918582h.pdf [file b918582h.pdf]

## ELECTRONIC SUPPORTING INFORMATION

### Reduction mechanism of a coordinated superoxide by thiols in acidic media

Ritu Mishra, Subrata Mukhopadhyay and Rupendranath Banerjee\*

Department of Chemistry, Jadavpur University, Kolkata 700 032, India.

| Contents                                                                                                         | Page |
|------------------------------------------------------------------------------------------------------------------|------|
| <b>Figure S1.</b> Kinetic profile at 700 nm for the reduction of <b>1</b> by cys in absence of dipic.            | S2   |
| <b>Figure S2.</b> Kinetic profile at 700 nm for the reduction of <b>1</b> by cys in presence of dipic.           | S3   |
| <b>Table S1.</b> Cu <sup>2+</sup> catalysis and its suppression by dipic in the reduction of <b>1</b> by thiols. | S4   |
| <b>Figure S3.</b> Observed Raman Spectrum for complex <b>1</b> .                                                 | S5   |
| <b>Table S2.</b> Variation of first order rate constant ( $k_o$ ) with [thiol].                                  | S6   |
| <b>Figure S4.</b> Variation of first order rate constant ( $k_o$ ) with $[H^+]^{-1}$ for tga.                    | S7   |
| <b>Figure S5.</b> Variation of first order rate constant ( $k_o$ ) with $[H^+]^{-1}$ for mercap.                 | S8   |
| <b>Table S3.</b> Effect of $[H^+]$ on first order rate constant ( $k_o$ ).                                       | S9   |
| <b>Table S4.</b> Stoichiometric results for the reduction of <b>1</b> by thiols.                                 | S10  |
| <b>Table S5.</b> Estimation of cystine sulfinic acid.                                                            | S10  |

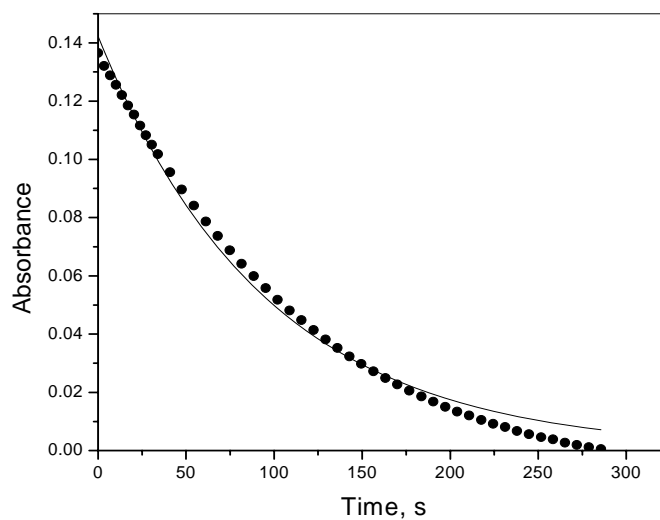

**Fig. S1** Kinetic profile at 700 nm for the reduction of **1** (0.50 mM) with cys (5.0 mM) without dipicolinic acid.  $[H^+] = 0.05$  M,  $[Cu^{2+}] = 5.0$   $\mu$ M (added as perchlorate salt),  $I = 0.50$  M ( $NaClO_4$ ),  $T = 25.0$  °C. The solid line is the attempted first-order fit (visibly unacceptable) of the experimental values (solid circles).

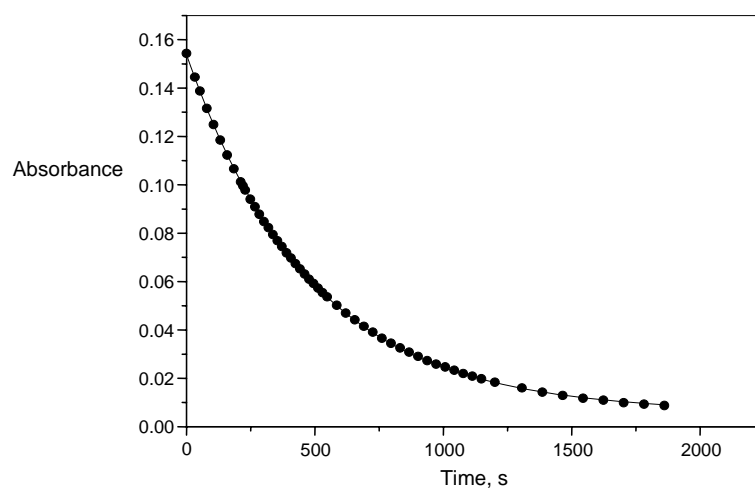

**Fig. S2** Excellent first-order fit (solid line) to the experimental values (solid circles) for the reduction of **1** (0.50 mM) with cys (5.0 mM).  $[H^+] = 0.05$  M, [dipicolinic acid] = 2.0 mM, I = 0.50 M (NaClO<sub>4</sub>), T = 25.0 °C.

**Table S1.**  $\text{Cu}^{2+}$  catalysis and its suppression by dipicolinic acid, in the reduction of **1** (0.50 mM) with cys (5.0 mM) in acid perchlorate media ( $[\text{H}^+] = 50.0$  mM,  $I = 0.50$  mM ( $\text{NaClO}_4$ )).

| $10^6[\text{Cu}^{2+}]$ , M                                    | [dipic], mM | $t_{1/2}$ , s <sup>a</sup> |
|---------------------------------------------------------------|-------------|----------------------------|
| 2.2 (present as impurity in the reaction media <sup>b</sup> ) | 0.0         | 164                        |
| 2.2 (present as impurity in the reaction media <sup>b</sup> ) | 2.0         | 330                        |
| 5.0 ( $\text{Cu}^{2+}$ added as perchlorate)                  | 1.0         | 130                        |
| 5.0 ( $\text{Cu}^{2+}$ added as perchlorate)                  | 2.0         | 330                        |
| 5.0 ( $\text{Cu}^{2+}$ added as perchlorate)                  | 4.0         | 330                        |
| 5.0 ( $\text{Cu}^{2+}$ added as perchlorate)                  | 0.0         | 65                         |

<sup>a</sup>Time required for initial absorbance of **1** to become half.

<sup>b</sup>As determined by AAS.

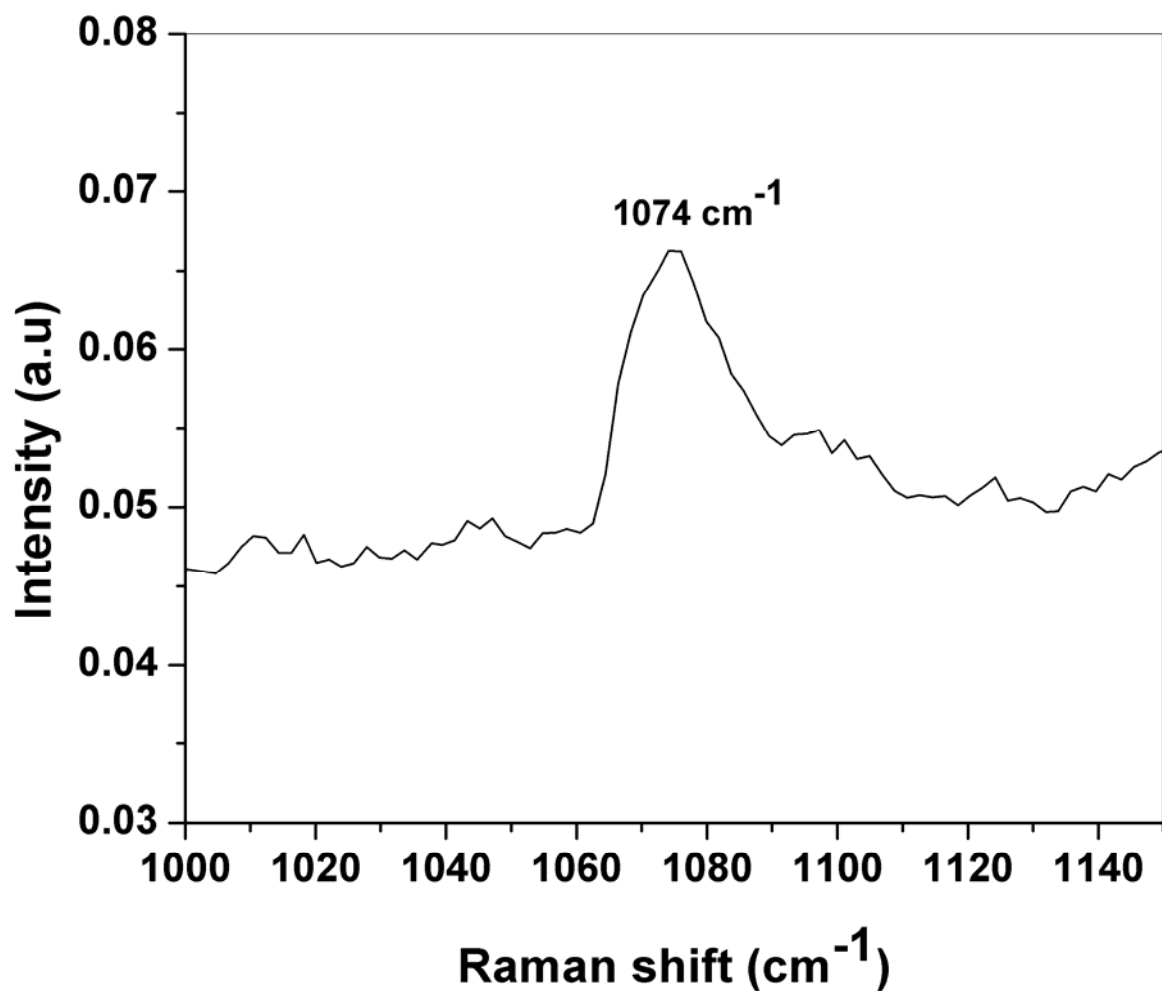

**Fig. S3** Observed Raman Spectrum for complex **1**. Peak position expected<sup>1</sup> at  $1075 \pm 10 \text{ cm}^{-1}$  for superoxo stretching of a pure sample.

**Reference**

1. C. G. Barraclough, G. A. Lawrance and P. A. Lay, *Inorg. Chem.*, 1978, **17**, 3317.

**Table S2.** Variation of  $k_o$  with [thiol], [1] = 0.50 mM, [H<sup>+</sup>] = 0.05 M for cys, 0.030 M for mercap and tga, [dipicolinic acid] = 2.0 mM, I = 0.50 M (NaClO<sub>4</sub>), T = 25.0 °C.

| [thiol], M | $10^3 k_o, s^{-1}$ |            |         |
|------------|--------------------|------------|---------|
|            | for cys            | for mercap | for tga |
| 0.005      | 2.4                | 1.2        | 3.7     |
| 0.010      | 4.9                | 2.5        | 6.8     |
| 0.013      | 6.3                | 3.6        | 8.8     |
| 0.015      | 7.3                | 4.1        | 9.7     |
| 0.018      | 9.2                | 4.7        | 11.4    |
| 0.020      | 10.4               | 5.6        | 12.5    |

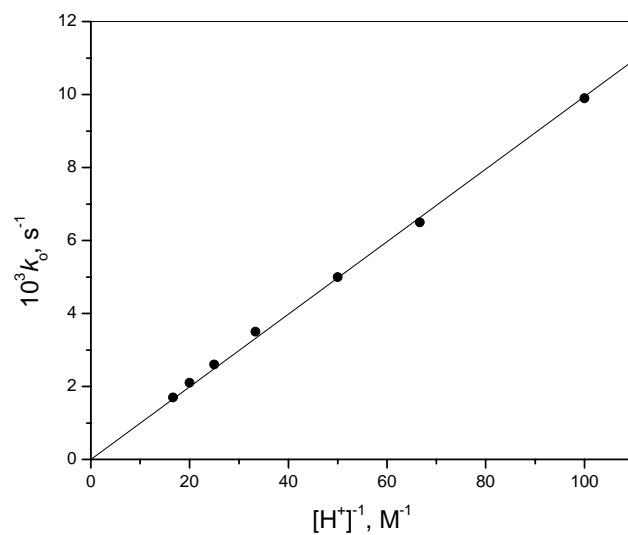

**Fig. S4** Variation of  $k_0$  with  $[H^+]^{-1}$ . [tga] = 5.0 mM, [1] = 0.50 mM, [dipicolinic acid] = 2.0 mM, I = 0.5 M (NaClO<sub>4</sub>), T = 25.0 °C.

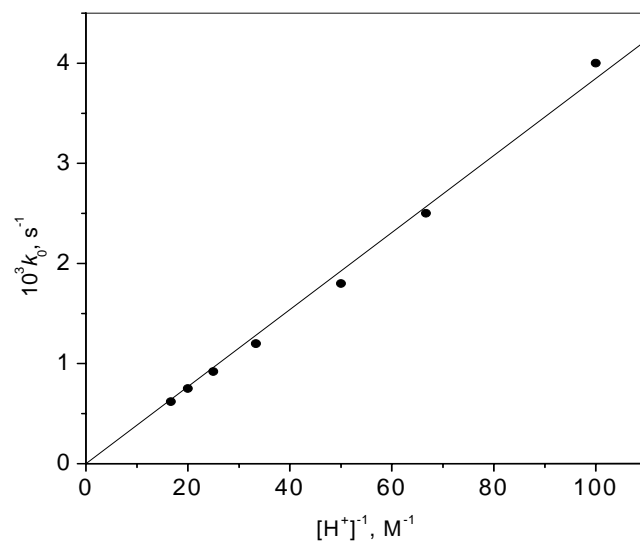

**Fig. S5** Variation of  $k_0$  with  $[H^+]^{-1}$ . [mercap] = 5.0 mM, [1] = 0.50 mM, [dipicolinic acid] = 2.0 mM, I = 0.50 M (NaClO<sub>4</sub>), T = 25.0 °C.



**Table S3.** Effect of  $[H^+]$  on  $k_o$ :  $[1] = 0.50$  mM,  $[\text{thiol}] = 5.0$  mM,  $[\text{dipicolinic acid}] = 2.0$  mM,  $I = 0.5$  M ( $\text{NaClO}_4$ ),  $T = 25$  °C.

| $[H^+]$ , M | $10^3 k_o, s^{-1}$ |     |      |
|-------------|--------------------|-----|------|
|             | mercap             | tga | cys  |
| 0.010       | 4.0                | 9.9 | 12.4 |
| 0.015       | 2.7                | 6.5 | 8.3  |
| 0.020       | 1.8                | 5.0 | 6.2  |
| 0.030       | 1.2                | 3.5 | 4.1  |
| 0.040       | 0.92               | 2.6 | 3.1  |
| 0.050       | 0.75               | 2.1 | 2.4  |
| 0.060       | 0.62               | 1.7 | 1.9  |

**Table S4.** Stoichiometric results for the oxidation of thiols by **1**,  $[H^+] = 0.05$  M for cys, 0.030 M for mercap and tga, [dipicolinic acid] = 2.0 mM, I = 0.50 M (NaClO<sub>4</sub>), T = 25.0 °C.

| [ <b>1</b> ], mM | $\Delta$ [thiol], mM |     |     | $\Delta$ [ <b>1</b> ]/ $\Delta$ [thiol] | Av. $\Delta$ [ <b>1</b> ]/ $\Delta$ [thiol] |
|------------------|----------------------|-----|-----|-----------------------------------------|---------------------------------------------|
|                  | mercap               | tga | cys |                                         |                                             |
| 3.0              | 2.8                  |     |     | 1.07                                    | 1.02                                        |
| 4.0              | 4.5                  |     |     | 0.97                                    |                                             |
| 2.0              |                      | 1.9 |     | 1.05                                    | 1.04                                        |
| 5.0              |                      | 4.8 |     | 1.04                                    |                                             |
| 3.0              |                      |     | 1.8 | 1.67                                    | 1.64                                        |
| 5.0              |                      |     | 3.1 | 1.61                                    |                                             |

**Table S5.** Estimation of cystine sulfinic acid,  $[H^+] = 0.05$  M, [dipicolinic acid] = 2.0 mM, I = 0.50 M (NaClO<sub>4</sub>), T = 25.0 °C.

| [ <b>1</b> ], mM | [cys], mM | unreacted cys, mM | cys oxidized, mM | (unreacted cys + sulfinic acid), mM | [cystine sulfinic acid], mM | % cys converted to sulfinic acid |
|------------------|-----------|-------------------|------------------|-------------------------------------|-----------------------------|----------------------------------|
| 2.0              | 2.5       | 1.3               | 1.2              | 1.55                                | 0.25                        | 20.8%                            |
| 3.0              | 1.5       | 0.0               | 1.5              | 0.29                                | 0.29                        | 19.3%                            |
